# Supplementary material for: Phylogeography of Daphnia magna Straus (Crustacea: Cladocera) in Northern Eurasia: Evidence for a deep longitudinal split between mitochondrial lineages
Source: PubMed Central journal article supplement (PMC5854346; doi:10.1371/journal.pone.0194045), 2018-03-15
Supplement: pone.0194045.s004.pdf [file pone.0194045.s004.pdf]

Zh033\_Dsimilis\_Saratov

Zh037\_Dsinensis\_Sakhalin

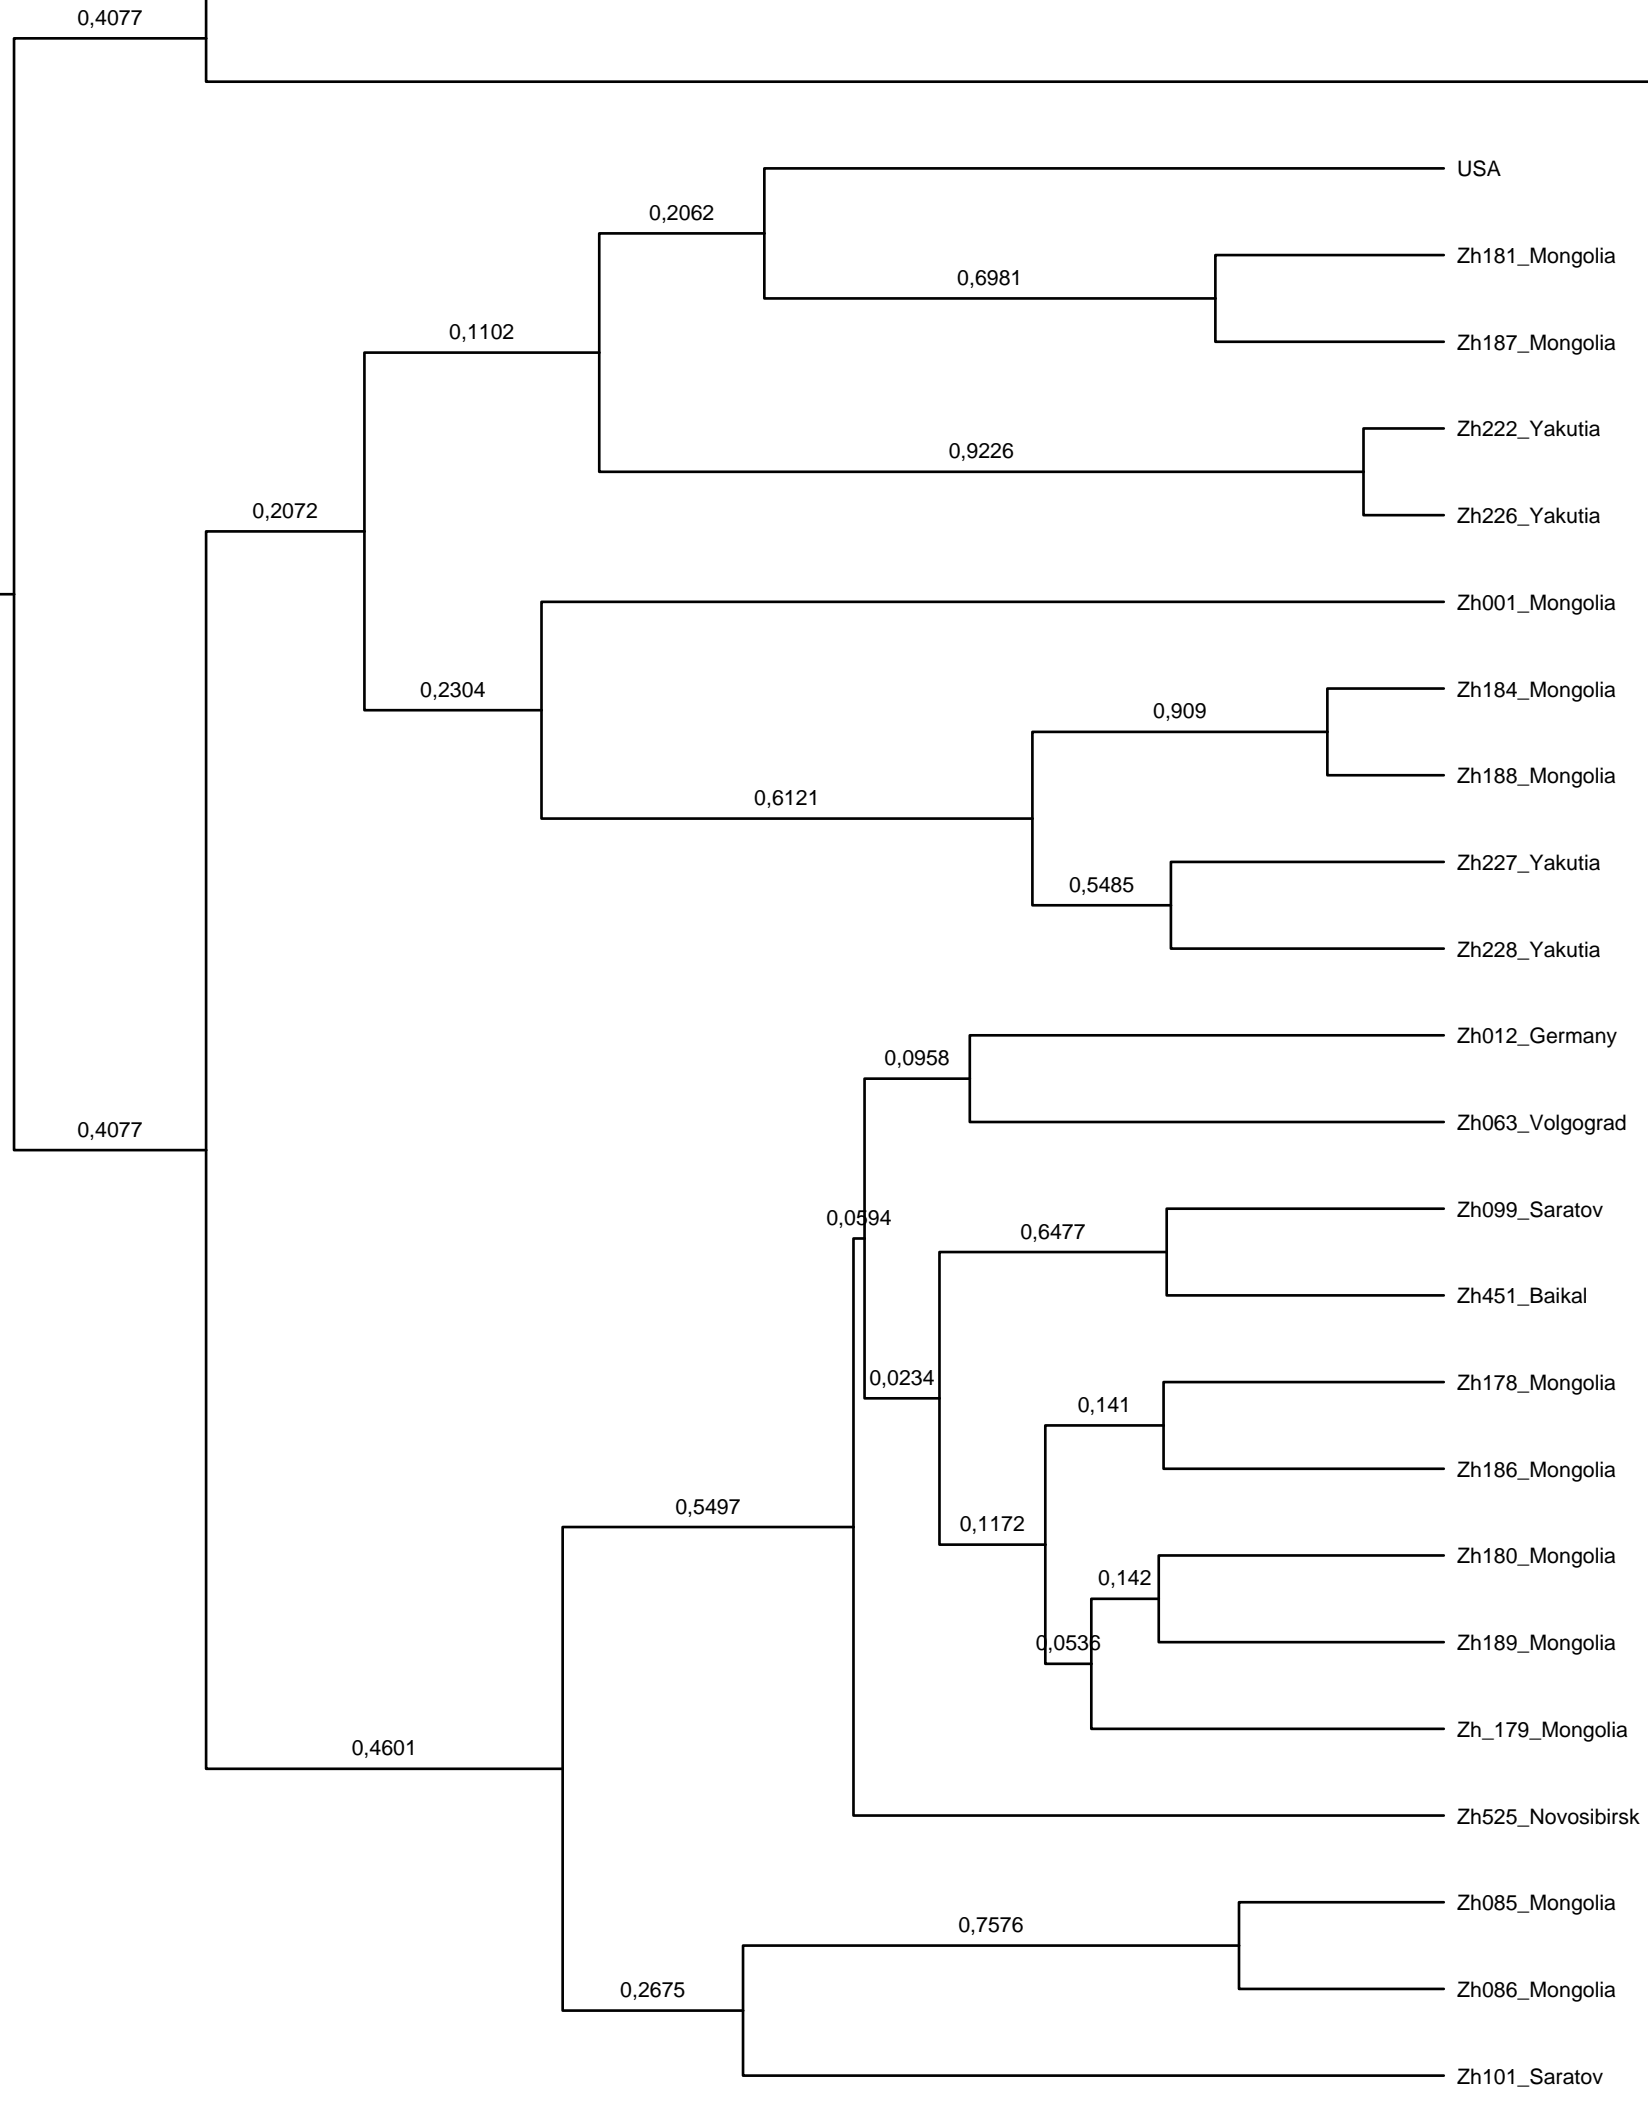

0,4077

0,2062

0,6981

0,1102

0,9226

0,2072

0,2304

0,6121

0,909

0,5485

0,4077

0,0958

0,0894

0,6477

0,0234

0,141

0,5497

0,1172

0,142

0,0535

0,4601

0,7576

0,2675

0.002
